# Supplementary material for: Optimizing alfalfa productivity and persistence versus greenhouse gases fluxes in a continental arid region
Source: PeerJ. 2020 Mar 10;8:e8738. doi: 10.7717/peerj.8738 (PMC7069402; doi:10.7717/peerj.8738)
Supplement: Supplemental Information 1 [file peerj-08-8738-s001.xls]

## Sheet: sheet 1
				kg/ha	kg/ha	（ug/m2/h)	(mg/m2/h)	(ug/m2/h)	0-10cmTP(mg/cm3)	cmSOC(mg/cm3)	0-10CMTN(mg/cm3)	0-10cmMoisture(g/cm3)
Month	Standage	block	Soil temperature	Abovegroud biomass	underground biomass	FCH4	FCO2	FN2O	TP0_10	SOC0_10	TN0_10	Moisture0_10
4	7	1	13.5875	162.193	2566.06	-22.6646	322.18	3.37017	1.0111	23.8564	9.64135	0.359227
4	7	2	13.6578	148.472	2382.53	-23.4568	290.206	2.56217	1.04728	23.1227	10.0934	0.367072
4	7	3	13.325	138.82	2401.78	-20.0455	327.104	2.96617	1.00657	25.7606	10.8094	0.364032
6	7	1	21.6125	4363.86	4392.3	-15.0356	558.515	4.3859	0.961576	26.4143	10.9837	0.265891
6	7	2	21.6875	4544.43	4650.31	-13.4899	585.793	3.91995	0.763008	28.2412	9.04728	0.270513
6	7	3	21.7125	4288.4	4283.03	-14.4876	454.72	5.48723	1.01174	24.5294	10.3382	0.275647
7	7	1	22.5375	1214.26	4932.12	-11.0671	492.196	7.53201	0.995403	30.2072	11.2019	0.214455
7	7	2	22.4375	1297.86	4765.07	-13.2121	529.467	9.32967	0.974833	32.3488	9.57609	0.226373
7	7	3	22.7375	1221.71	4803.57	-11.5746	611.906	7.56578	0.809757	29.901	8.57781	0.211815
8	7	1	20.5875	2053.86	4678.73	-18.3035	394.928	5.26333	0.974036	19.1787	9.9376	0.241417
8	7	2	18.8875	2136.43	4703.32	-16.7349	392.234	5.76517	0.952055	20.8625	9.75327	0.240861
8	7	3	17.95	1908.4	4543.75	-17.2594	384.889	4.50513	0.913736	18.0112	9.636	0.242627
10	7	1	11.5	976.78	4485.51	-29.361	218.804	3.73625	1.13138	23.8446	10.3864	0.38422
10	7	2	12.4875	1040.41	4565.07	-22.8484	201.393	3.14406	1.08209	24.5825	10.3803	0.395152
10	7	3	12.7875	850.21	4603.57	-21.1403	214.197	3.49508	1.06527	24.6224	10.1813	0.362114
4	5	1	16.03	175.236	2466.07	-25.7573	298.622	3.36849	1.072	21.477	10.7673	0.384953
4	5	2	14.56	157.242	2057.16	-25.4279	401.11	4.20254	1.07599	25.0126	11.5892	0.383572
4	5	3	14.49	186.232	2349.12	-24.1971	349.377	4.06637	1.0855	28.971	10.1217	0.394261
6	5	1	21.0625	5184.73	3997.64	-23.3988	587.352	7.28595	0.918463	28.645	11.244	0.300842
6	5	2	20.7625	5391.84	3810.32	-21.5272	604.594	8.05367	1.0371	26.9979	9.10026	0.317525
6	5	3	22.325	5306.65	4040.48	-21.2192	518.502	8.01414	0.984197	28.1187	11.6787	0.310215
7	5	1	22.6	1588.23	4532.13	-15.58	623.329	8.99824	0.978243	31.0819	10.5388	0.231968
7	5	2	23.5	1580.48	4314.33	-14.8453	610.125	11.1649	0.906715	31.0494	9.07449	0.229767
7	5	3	23.6	1547	4698.24	-13.3131	591.414	9.20895	1.01243	30.2136	10.9328	0.216938
8	5	1	16.9875	2944.73	4298.74	-15.6494	508.817	6.91667	1.05773	26.4058	10.5149	0.256257
8	5	2	15.725	2990.84	4010.04	-15.8994	489.86	6.85287	0.972087	26.9796	10.4029	0.241867
8	5	3	15.725	2884.65	4413.15	-15.6494	509.359	7.07871	1.15675	26.6747	11.08	0.238091
10	5	1	12.65	1349.03	4195.53	-26.4678	228.449	2.67878	1.16712	25.6762	11.6962	0.416991
10	5	2	10.4625	1406.77	3818.61	-28.6145	238.596	3.70362	1.17301	26.5968	11.688	0.419243
10	5	3	11.8125	1291.31	4253.33	-22.6798	222.249	2	1.1238	24.3751	11.1097	0.404558
4	3	1	12.5625	206.601	1743.93	-15.127	252.61	1.69027	1.02003	23.5872	10.3424	0.376016
4	3	2	12.5625	214.143	1621.29	-16.0188	317.391	2.04354	1.02427	24.9817	9.59	0.376483
4	3	3	13.625	199.07	1686.07	-18.9682	344.783	1.30739	1.06737	24.6846	11.3227	0.374993
6	3	1	21.9875	4349.03	2806.68	-6.98846	444.64	4.73374	0.923463	27.8961	10.6955	0.271986
6	3	2	21.675	4422.85	2710.19	-10.0487	438.63	4.91699	0.965223	26.4885	9.53922	0.236899
6	3	3	22.5625	4520.4	2910.32	-11.1802	433.285	6.88059	0.972273	25.8996	10.6955	0.252891
7	3	1	20.4875	1783.77	3407.86	-6.76741	542.086	9.3473	0.901637	34.3954	10.8574	0.218124
7	3	2	20.7875	1743.63	3282.58	-7.03775	566.222	7.50252	0.885091	28.5224	9.38785	0.225086
7	3	3	20.5375	1712	3412.14	-6.98059	505.407	7.25252	0.957145	27.0123	9.95681	0.221743
8	3	1	16.825	2368.03	3218.26	-8.73794	421.864	5.6814	1.04582	25.5162	10.6107	0.245178
8	3	2	18.5125	2294.85	3346.71	-6.6635	459.369	5.80234	0.913828	26.3341	10.5905	0.241787
8	3	3	16.4625	2182.4	3182.75	-6.80993	442.103	5.91667	0.991503	27.9199	10.562	0.25176
10	3	1	12.4125	977.342	2937.47	-23.7015	237.973	1.98427	1.10062	24.66	10.96	0.323178
10	3	2	12.125	1007.03	3018.45	-22.6422	142.447	2.24611	1.06898	24.66	10.96	0.331218
10	3	3	9.2375	938.766	3041.53	-20.4713	159.775	2.11521	1.0737	24.66	10.96	0.340908
4	2	1	12.55	171.601	1601.58	-16.6289	284.064	2.27703	1.03183	23.0041	10.7182	0.386571
4	2	2	13.7125	158.143	1545.86	-15.7925	314.888	1.5135	1.00415	22.7322	9.80414	0.406172
4	2	3	13.5125	164.07	1496.34	-19.0391	299.741	2	1.02258	26.834	9.9367	0.412102
6	2	1	21.9875	3988.39	2382.68	-9.16748	423.943	4.47595	0.924597	26.9104	10.4478	0.308179
6	2	2	21.675	3968.59	2587.96	-9.01745	400.246	5.59802	0.92634	21.852	9.38803	0.309144
6	2	3	22.5625	3987.08	2243.77	-9.50026	391.808	6.35941	0.93647	25.4538	10.1242	0.326361
7	2	1	21.25	1210.87	2803.15	-1.21281	501.07	7.1114	0.903028	27.576	9.2508	0.19144
7	2	2	21.625	1174.49	2691.71	-2.46425	523.165	6.43372	0.939844	28.7234	9.71776	0.231184
7	2	3	21.425	1177.2	2992.68	-3.86753	555.038	8.68377	0.830974	29.1663	9.51638	0.215468
8	2	1	18.0125	1671.39	2643.31	-6.09831	442.855	6.41667	0.906788	24.4148	10.4387	0.278985
8	2	2	17.925	1658.59	2526.3	-5.10752	427.56	5.63243	0.970484	25.4939	9.64138	0.267249
8	2	3	16.575	1677.08	2742.31	-4.60995	426.828	5.81448	0.958173	25.82	9.7661	0.267992
10	2	1	10.375	796.903	2413	-10.0797	192.089	1.25	1.0278	24.4557	9.94741	0.405823
10	2	2	10.125	793.367	2257.13	-9.34836	192.812	1.25	1.02634	26.3589	11.688	0.416509
10	2	3	11.1625	772.373	2543.04	-10.4456	210.155	1	1.05848	24.377	10.2476	0.427036
